# Supplementary material
Source: PubMed Central journal article supplement (PMC6041946)

# CAME: Identification of Chromatin Accessibility from Nucleosome Occupancy and Methylome Sequencing

Yongjun Piao<sup>3,5</sup>, Seong Keon Lee<sup>6</sup>, Eun-Joon Lee<sup>3</sup>, Keith D. Robertson<sup>4</sup>, Huidong Shi<sup>2,3</sup>, Keun Ho Ryu<sup>5,\*</sup> and Jeong-Hyeon Choi<sup>1,2,\*</sup>

---

## Supplementary Algorithm 1. Seed detection

---

**Input:**  $\delta, d$

```
1. for  $i \leftarrow 1$  to  $N$  d
2.   if ( $\beta_i \leq \delta$ ) then
3.      $startPosition \leftarrow GCH_i$ 
4.     while ( $\beta_i > \delta$  or  $distance(GCH_i, GCH_{i+1}) > d$ )
5.        $i \leftarrow i + 1$ 
6.     endwhile
7.      $endPosition \leftarrow GCH_i$ 
8.      $average \leftarrow calculate(startPosition, endPosition)$ 
9.      $insert(startPosition, endPosition, average)$  to  $S'$ 
10.  endif
11. endfor
12. return  $S'$ 
```

---

---

## Supplementary Algorithm 2. Seed extension

---

**Input:**  $S', \mu, \epsilon, d, \Delta$

```
1. while ( $\forall S$  is considered,  $S \in S'$ )
2.    $S_i \leftarrow selectStartingPoint(S')$ 
3.   while (!  $stopCondition$ )
4.      $(peak, valley) \leftarrow searchNextPeakValley(S_i)$ 
5.      $tempAverage1 \leftarrow calculate(S_i, valley)$ 
6.      $tempAverage2 \leftarrow calculate(S_{i+1}, valley)$ 
7.     if ( $\beta_{peak} < \Delta$  and  $tempAverage1 \leq \mu$  and  $tempAverage2 \leq \epsilon$ )
8.        $S_i \leftarrow extendSeed(S_i, valley)$ 
9.     else
10.       $(ave, std) \leftarrow npMixture()$ 
11.      for  $j \leftarrow S_i$  to  $valley$  do
12.        if ( $\beta_{j+1} > ave + std$ ) then stop
13.      endfor
14.       $S_i \leftarrow extendSeed(S_i, j)$ 
15.       $stopCondition \leftarrow true$ 
16.    endif
17.  endwhile
18.   $insert(S_i)$  to  $R'$ 
19. endwhile
20. return  $R'$ 
```

---

**Supplementary Table 1.** Performance change of CAME by CCR and OCR detection methods. For the OCR detection method, parameters  $d=150$ ,  $\Delta=0.6$ , and  $(\delta, \varepsilon) = (0.9, 0.6), (0.8, 0.5), (0.7, 0.5)$ , and  $(0.6, 0.5)$  were used.

|    | CCR detection |             |          | OCR detection |             |          |
|----|---------------|-------------|----------|---------------|-------------|----------|
|    | Sensitivity   | Specificity | Accuracy | Sensitivity   | Specificity | Accuracy |
| D1 | 0.9954        | 0.9999      | 0.9968   | 0.9997        | 0.9907      | 0.9970   |
| D2 | 0.9964        | 0.9997      | 0.9974   | 0.9976        | 0.9884      | 0.9948   |
| D3 | 0.9941        | 0.9928      | 0.9937   | 0.9901        | 0.9788      | 0.9866   |
| D4 | 0.9470        | 0.9271      | 0.9408   | 0.9188        | 0.9425      | 0.9261   |

**Supplementary Fig. 1.** Bar charts of performance change of CAME by CCR and OCR detection methods

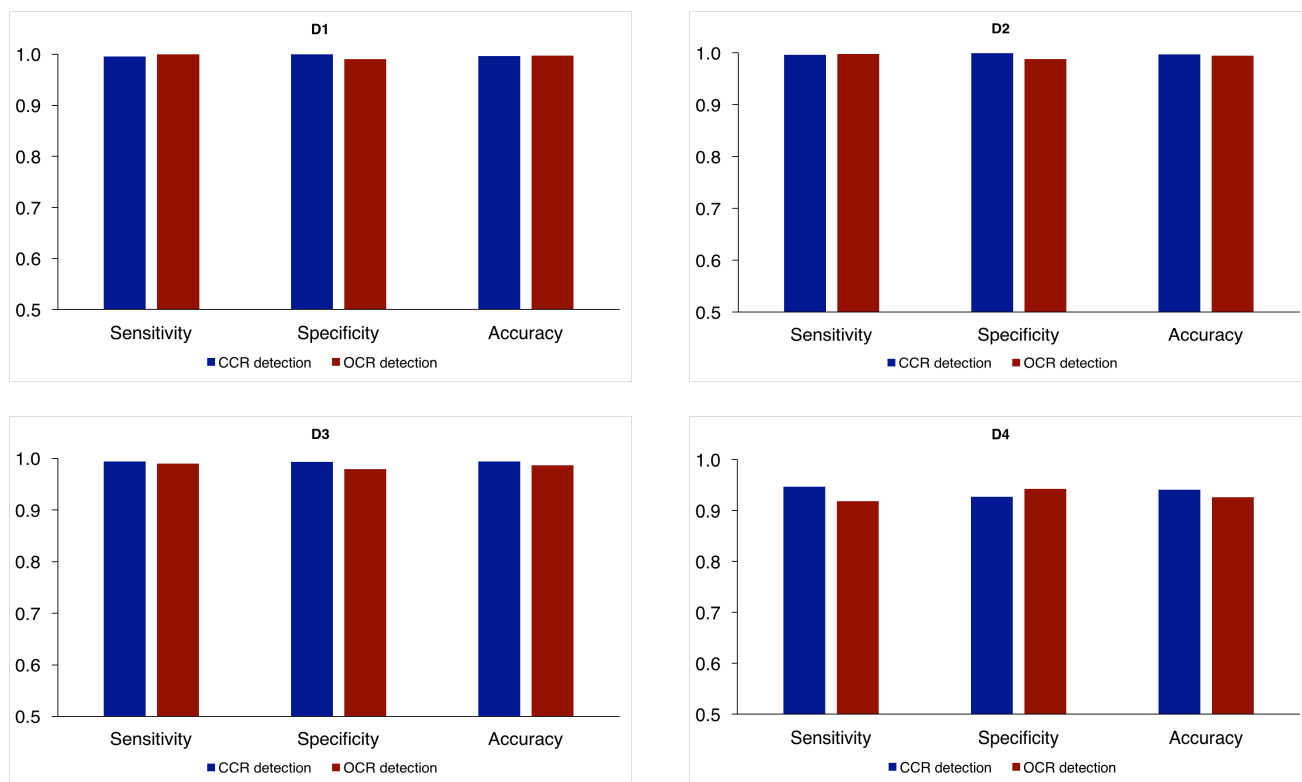

Supplementary Fig. 2. ROC curve with 10 threshold values for the average methylation score  $\delta$ : 0.1, 0.2, 0.3, 0.4, 0.5, 0.6, 0.7, 0.8, 0.9, and 1.0.

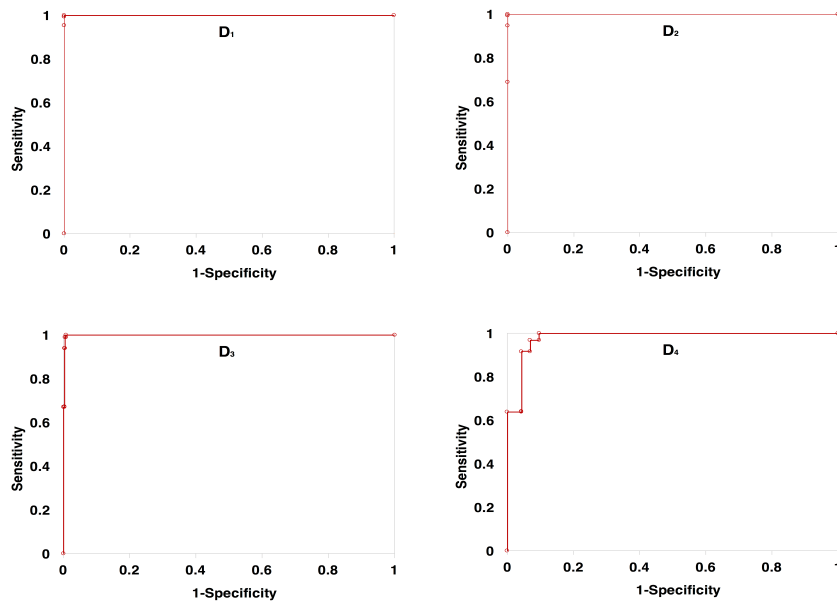

Supplementary Fig. 3. ROC curve with 10 threshold values for the jump score  $\Delta$ : 0.1, 0.2, 0.3, 0.4, 0.5, 0.6, 0.7, 0.8, 0.9, and 1.0.

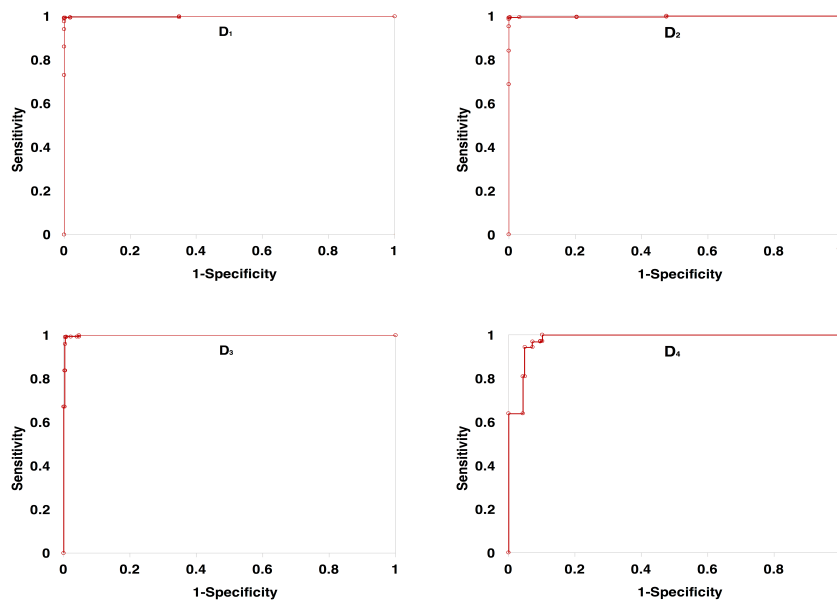

**Supplementary Fig. 4.** The left plot shows a scatter plot between chromatin accessibility and DNA methylation where each x-pixel indicates average GCH methylation score and each y-pixel represents average HCG methylation score of a CCR (OCR), and each point has different degree of the color (light to dark) based on its density. The top and bottom left (right) quadrants represent hyper- and hypo-methylated CCRs (OCRs), respectively. The right plot shows histograms for the number of detected regions for each of the categories (hypo- and hyper-methylated CCRs and OCRs). CCRs (OCRs) with HCG methylation score that are > 0.7 were considered as hyper-methylated and those with HCG methylation score that are < 0.3 were defined as hypo-methylated. The histogram shows the number of detected regions for each of the categories.

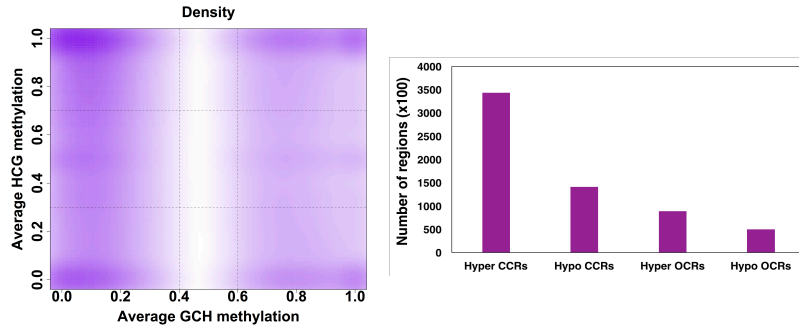

**Supplementary Fig. 5.** DAVID analysis for hyper-methylated CCRs (A) and OCRs (B), and hypo-methylated CCRs (C) and OCRs (D).

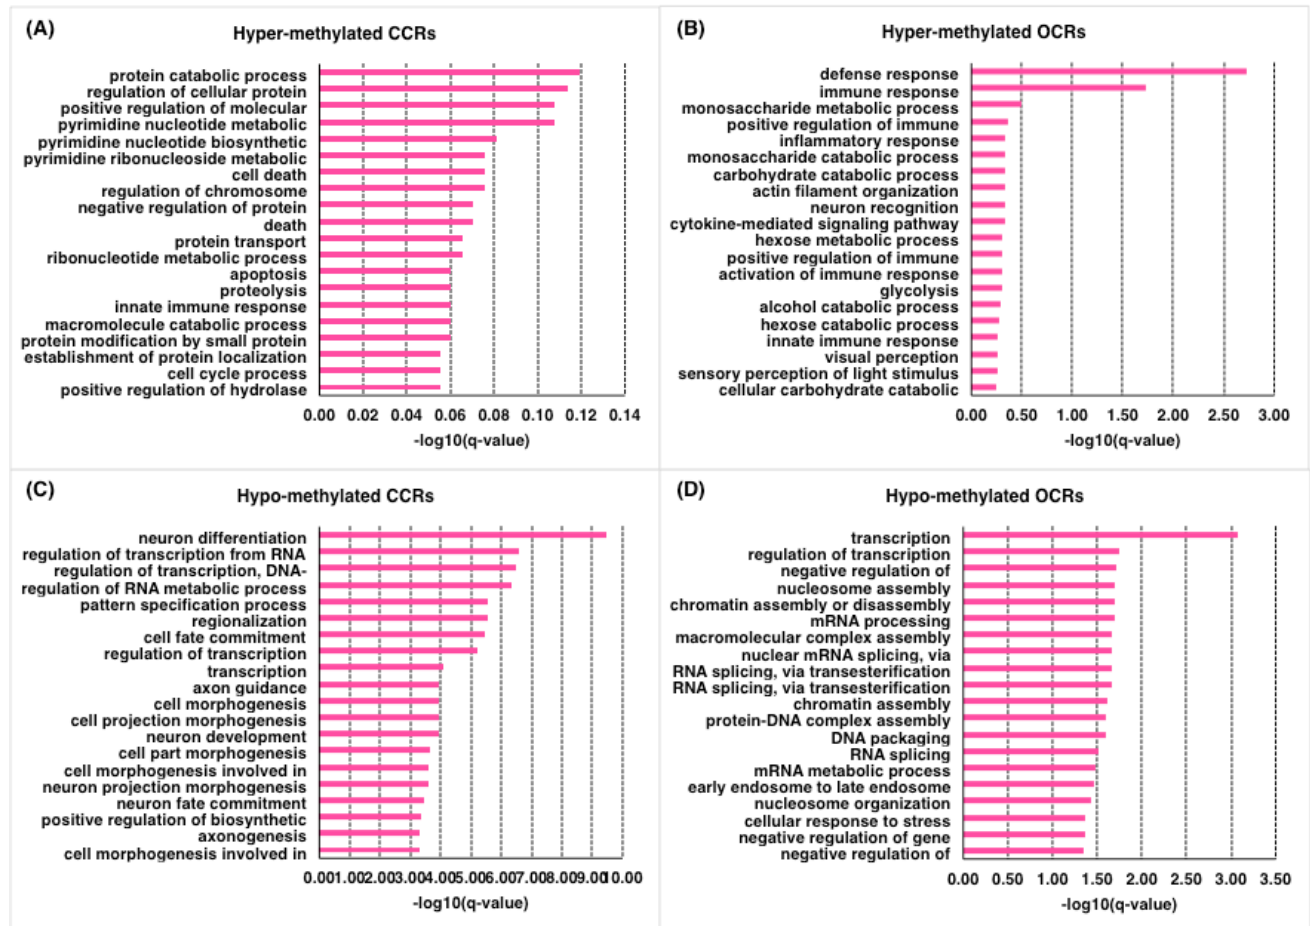

Supplement: btw785_supp.pdf [file btw785_supp.pdf]
